# Supplementary material
Source: PubMed Central journal article supplement (PMC4741047)
Supplement: CJN.07370715_CJN07370715SupplementaryData.pdf [file CJN.07370715_CJN07370715SupplementaryData.pdf]

Supplement Table 1

| Patient             | Gender | Nucleotide change                          | Effect on protein                         | Reference | Score (Mutation Taster, Polyphen-2, SIFT) | Age at onset (CNS/months) | Response to CsA (time to CR/PR (months)) | Kidney biopsy          | Time to ESRD (months) | Renal outcome |
|---------------------|--------|--------------------------------------------|-------------------------------------------|-----------|-------------------------------------------|---------------------------|------------------------------------------|------------------------|-----------------------|---------------|
| <b><i>NPHS1</i></b> |        |                                            |                                           |           |                                           |                           |                                          |                        |                       |               |
| E2                  | m      | c.515_517delCCA (H)                        | p.Thr172del                               | [1]       |                                           | CNS                       | 0                                        | Interstitial sclerosis | 70                    | RTx           |
| E4                  | m      | c.614_621delCACCCGGinsTT (H)               | p.Thr205_Arg207delinsIle                  | [1]       |                                           | CNS                       | 0                                        | Not done               |                       | CKD           |
| E5                  | f      | c.2386G>A (h), c.2928-3C>G (h)             | p.Gly796Arg, splice mutation              | [2],[2]   |                                           | CNS                       | 0                                        | FSGS                   | 22                    | RTx           |
| E6 <sup>e</sup>     | m      | c.2618_2620delTCAsinsCC (H), c.2552C>T (H) | p.Phe873Serfs*32, p.Ala851Val             | [3],[4]   |                                           | CNS                       | N                                        | Finnish type           | 40                    | RTx           |
| E7 <sup>e</sup>     | f      | c.2618_2620delTCAsinsCC (H), c.2552C>T (H) | p.Phe873Serfs*32, p.Ala851Val             | [3],[4]   |                                           | CNS                       | 0                                        | Not done               |                       | CKD           |
| E9                  | f      | c.1699T>A (H)                              | p.Cys567Ser                               | [2]       |                                           | CNS                       | 0                                        | DMS                    | 38                    | RTx           |
| E10                 | m      | c.3108A>G (H)                              | p.Pro1036Pro/splice mutation <sup>a</sup> | [5]       |                                           | CNS                       | 0                                        | Not done               |                       | CKD           |
| E11                 | m      | c.1019C>A (H)                              | p.Pro340His                               | [6]       |                                           | CNS                       | 0                                        | Not done               |                       | CKD           |
| E12 <sup>e</sup>    | f      | c.2618_2620delTCAsinsCC (H), c.2552C>T (H) | p.Phe873Serfs*32, p.Ala851Val             | [3],[4]   |                                           | CNS                       | 0                                        | Not done               | 94                    | RTx           |
| E17 <sup>e</sup>    | f      | c.2618_2620delTCAsinsCC (H), c.2552C>T (H) | p.Phe873Serfs*32, p.Ala851Val             | [3],[4]   |                                           | CNS                       | N                                        | Not done               | 37                    | RTx           |
| E19 <sup>e</sup>    | f      | c.2618_2620delTCAsinsCC (H), c.2552C>T (H) | p.Phe873Serfs*32, p.Ala851Val             | [3],[4]   |                                           | CNS                       | 0                                        | MCN                    | 23                    | RTx           |
| E20 <sup>e</sup>    | m      | c.2618_2620delTCAsinsCC (H), c.2552C>T (H) | p.Phe873Serfs*32, p.Ala851Val             | [3],[4]   |                                           | CNS                       | 0                                        | Not done               | 23                    | RTx           |
| E21                 | m      | c.563A>T (H), c.3286G>T (H)                | p.Asn188Ile, p.Gly1096Cys                 | [7],[2]   |                                           | CNS                       | 0                                        | Not done               | 62                    | RTx           |
| H15                 | m      | c.1248dupA (h), c.2606_2607dupCC (h)       | p.Cys417Metfs*2, p.Asn870Profs*36         | [8],[1]   |                                           | CNS                       | N                                        | Finnish type           |                       | normal GFR    |
| H19                 | f      | c.866G>A (H)                               | p.Trp289*                                 | [6]       |                                           | CNS                       | 0                                        | FSGS                   | 0                     | RTx           |
| H21                 | f      | c.2540_2543delCTAA (h), c.2800C>T (h)      | p.Thr847Argfs*57, p.Gln934*               | [9],[10]  |                                           | CNS                       | 0                                        | FSGS                   | 34                    | RTx           |
| H24 <sup>f</sup>    | m      | c.2815+2T>A (H)                            | Splice mutation                           | [4]       |                                           | CNS                       | 0                                        | Not done               | No data               | RTx           |
| H25 <sup>e</sup>    | f      | c.1379G>A (H)                              | p.Arg460Gln                               | [3]       |                                           | CNS                       | 0                                        | MCN                    | No data               | RTx           |
| H26 <sup>e</sup>    | m      | c.1379G>A (H)                              | p.Arg460Gln                               | [3]       |                                           | CNS                       | 0                                        | Not done               | No data               | RTx           |
| H28 <sup>f</sup>    | m      | c.2815+2T>A (H)                            | Splice mutation                           | [4]       |                                           | CNS                       | 0                                        | Not done               | 31                    | RTx           |
| H42                 | f      | c.3250dupG (H)                             | p.Val1084Glyfs*12                         | [11]      |                                           | CNS                       | 0                                        | Not done               | No data               | RTx           |
| HH16                | m      | c.928G>A (h), c.2816-3T>G (h)              | p.Asp310Asn, splice mutation              | [12],[13] |                                           | CNS                       | CR (2 months)                            | MCN                    |                       | normal GFR    |

|                  |   |                              |                          |           |           |     |         |              |         |     |
|------------------|---|------------------------------|--------------------------|-----------|-----------|-----|---------|--------------|---------|-----|
| K18              | f | c.866G>A (H)                 | p.Trp289*                | [6]       |           | CNS | 0       | Not done     | 30      | RTx |
| K19              | m | c.1738T>C (H)                | p.Trp580Arg              | Novel     | Dc, pd, d | CNS | No data | Not done     | No data | HD  |
| K20              | m | c.515_517delCCA (H)          | p.Thr172del              | [1]       |           | CNS | No data | Not done     | No data | HD  |
| K21              | m | c.515_517delCCA (H)          | p.Thr172del              | [1]       |           | CNS | 0       | Finnish type | 8       | HD  |
| K22 <sup>h</sup> | m | c.3250dupG (H)               | p.Val1084Glyfs*12        | [11]      |           | CNS | 0       | Finnish type | 15      | RTx |
| K23 <sup>h</sup> | f | c.3250dupG (H)               | p.Val1084Glyfs*12        | [11]      |           | CNS | 0       | Finnish type | 24      | RTx |
| K24              | m | c.1868G>T (H)                | p.Cys623Phe              | [1]       |           | CNS | 0       | Finnish type | 12      | RTx |
| MS1              | f | c.2816-4_2822del11 (H)       | Splice mutation          | [2]       |           | CNS | 0       | Finnish type | 72      | RTx |
| MS2              | f | c.614_621delCACCCGGinsTT (H) | p.Thr205_Arg207delinslle | [1]       |           | CNS | N       | Not done     | 24      | RTx |
| MS9              | f | c.515_517delCCA (H)          | p.Thr172del              | [2]       |           | CNS | 0       | DMS          | 25      | RTx |
| MS10             | f | c.1713delC (H)               | p.Ser571Argfs*51         | [2]       |           | CNS | 0       | Finnish type | 7       | RTx |
| MS28             | m | c.658T>G (h), c.2746G>T (h)  | p.Ser220Ala, p.Ala916Ser | [14],[15] |           | 168 | N       | FSGS         | 1       | RTx |
| MS37             | m | c.320C>A (h), c.1868G>T (h)  | p.Ala107Glu, p.Cys623Phe | [2]       |           | 9   | 0       | MCN          | 134     | RTx |

#### **NPHS2**

|     |   |                              |                                       |           |  |     |               |                           |     |            |
|-----|---|------------------------------|---------------------------------------|-----------|--|-----|---------------|---------------------------|-----|------------|
| E14 | m | c.413G>A (H)                 | p.Arg138Gln                           | [16]      |  | CNS | N             | MCN                       | 82  | RTx        |
| E15 | f | c.871C>T (h), c.686G>A (h)   | p.Arg291Trp, p.Arg229Gln              | [16],[17] |  | CNS | 0             | MCN                       | 255 | RTx        |
| E18 | m | c.412C>T (h), c.413G>A (h)   | p.Arg138*, p.Arg138Gln                | [16],[16] |  | CNS | 0             | Not done                  | 192 | RTx        |
| E22 | f | c.503G>A (H)                 | p.Arg168His                           | [18]      |  | 31  | 0             | IgA nephropathy           | 52  | RTx        |
| E28 | m | c.413G>A (h), c.419delG (h)  | p.Arg138Gln, p.Gly140Aspfs*41         | [16],[16] |  | 42  | 0             | MC                        |     | normal GFR |
| E30 | m | c.413G>A (h), c.868G>A (h)   | p.Arg138Gln, p.Val290Met              | [16],[19] |  | 158 | PR (6 months) | MC                        |     | CKD        |
| E36 | m | c.686G>A (h), c.890C>T (h)   | p.Ala297Val, p.Arg229Gln              | [17],[17] |  | 141 | 0             | FSGS                      |     | normal GFR |
| E38 | m | c.467dupT (H)                | p.Leu156Phefs*11                      | [20]      |  | 8   | N             | FSGS                      | 104 | RTx        |
| E42 | m | c.725C>T (H)                 | p.Ala242Val                           | [20]      |  | 40  | N             | FSGS                      |     | CKD        |
| E51 | m | c.413G>A (H)                 | p.Arg138Gln                           | [16]      |  | 10  | 0             | MC                        | 103 | RTx        |
| E56 | f | c.413G>A (H)                 | p.Arg138Gln                           | [16]      |  | 9   | 0             | Not done                  | 65  | RTx        |
| H4  | f | c.686G>A (h), c.1032delT (h) | p.Phe344Leufs*4, p.Arg229Gln          | [20],[17] |  | 12  | No data       | MCN                       |     | No data    |
| H9  | f | c.413G>A (H)                 | p.Arg138Gln                           | [16]      |  | 5   | 0             | DMS                       | 42  | RTx        |
| H20 | m | c.413G>A (h), c.686G>A (h)   | p.Arg138Gln, p.Arg229Gln <sup>b</sup> | [16],[17] |  | 45  | N             | Mesangio-proliferative GN | 58  | RTx        |

|                  |   |                                |                                  |           |            |     |         |          |     |            |
|------------------|---|--------------------------------|----------------------------------|-----------|------------|-----|---------|----------|-----|------------|
| H27              | f | c.413G>A (H)                   | p.Arg138Gln                      | [16]      |            | 30  | 0       | FSGS     | 77  | RTx        |
| I1               | f | c.855_856delAA (H)             | p.Arg286Thrfs*17                 | [16]      |            | 111 | N       | FSGS     | 12  | RTx        |
| HD3              | f | c.413G>A (h), c.451+2T>A       | p.Arg138Gln, splice mutation     | [16],[22] |            | 42  | N       | MCN      | 48  | RTx        |
| HD4              | m | c.413G>A (h), c.503G>A (h)     | p.Arg138Gln, p.Arg168His         | [16],[18] |            | 96  | N       | FSGS     | 38  | RTx        |
| HD5              | m | c.873+2T>A (h), c.794+7A>G (h) | Splice mutation, splice mutation | [22]      |            | 156 | N       | FSGS     | 73  | RTx        |
| HD6              | m | c.538G>A (H)                   | p.Val180Met                      | [16]      |            | 198 | N       | FSGS     | 42  | RTx        |
| HD7              | f | c.686G>A (h), c.929A>C (h)     | p.Glu310Ala, p.Arg229Gln         | [23],[17] |            | 51  | N       | FSGS     |     | normal GFR |
| HD8              | m | c.413G>A (h), c.873+2T>A (h)   | p.Arg138Gln, splice mutation     | [17],[22] |            | 42  | N       | FSGS     | 57  | RTx        |
| HH4              | f | c.413G>A (H)                   | p.Arg138Gln                      | [17]      |            | 65  | PR      | FSGS     | 25  | RTx        |
| HH27             | f | c.413G>A (H)                   | p.Arg138Gln                      | [17]      |            | CNS | N       | FSGS     | 47  | RTx        |
| HH28             | f | c.413G>A (H)                   | p.Arg138Gln                      | [17]      |            | 7   | N       | FSGS     | 18  | RTx        |
| K1               | m | c.413G>A (h), c.467dupT (h)    | p.Arg138Gln, p.Leu156Phefs*11    | [17],[20] |            | 15  | 0       | FSGS     | 69  | RTx        |
| K2               | f | c.413G>A (H)                   | p.Arg138Gln                      | [16]      |            | 74  | N       | FSGS     | 80  | RTx        |
| K3               | f | c.413G>A (h), c.868G>A (h)     | p.Arg138Gln, p.Val290Met         | [16],[19] |            | 72  | No data | FSGS     |     | normal GFR |
| K4               | f | c.353C>T (H)                   | p.Pro118Leu                      | [18]      |            | 30  | N       | FSGS     | 15  | RTx        |
| K5               | f | c.353C>T (H)                   | p.Pro118Leu                      | [18]      |            | CNS | 0       | Not done | 0   | PD         |
| K6               | m | c.873+1G>T (H)                 | Splice mutation                  | Novel     | Dc, na, na | 48  | N       | FSGS     |     | normal GFR |
| K7               | m | c.413G>A (H)                   | p.Arg138Gln                      | [16]      |            | 45  | 0       | FSGS     | 78  | RTx        |
| K8               | m | c.871C>T (h), c.686G>A (h)     | p.Arg229Gln, p.Val290Met         | [17],[19] |            | 241 | 0       | MCN      |     | normal GFR |
| M6               | f | c.1150T>C (H)                  | p.384Glnext*7                    | [24]      |            | 96  | N       | FSGS     |     | CKD        |
| MS3 <sup>l</sup> | f | c.413G>A (H)                   | p.Arg138Gln                      | [16]      |            | CNS | 0       | FSGS     | 86  | RTx        |
| MS4 <sup>i</sup> | f | c.413G>A (H)                   | p.Arg138Gln                      | [16]      |            | CNS | N       | FSGS     | 40  | RTx        |
| MS8              | m | c.413G>A (H)                   | p.Arg138Gln                      | [16]      |            | CNS | 0       | DMS      | 83  | RTx        |
| MS14             | f | c.413G>A (h), c.868G>A (h)     | p.Arg138Gln, p.Val290Met         | [16],[19] |            | 132 | 0       | FSGS     |     | normal GFR |
| MS17             | m | c.413G>A (H)                   | p.Arg138Gln                      | [16]      |            | 5   | 0       | Not done |     | CKD        |
| MS19             | m | c.467dupT (H)                  | p.Leu156Phefs*11                 | [20]      |            | 24  | PR      | FSGS     | 46  | RTx        |
| MS20             | f | c.868G>A (H)                   | p.Val290Met                      | [19]      |            | 11  | 0       | MCN      |     | normal GFR |
| MS36             | f | c.983A>G (h), c.686G>A (h)     | p.Gln328Arg, p.Arg229Gln         | [22]      |            | 106 | 0       | FSGS     |     | normal GFR |
| MS42             | f | c.G686A (h), c.929A>T (h)      | p.Glu310Val, p.Arg229Gln         | [17],[17] |            | 48  | N       | FSGS     | 102 | RTx        |

| <b>WT1</b> |   |                 |                 |       |            |     |         |                        |         |            |
|------------|---|-----------------|-----------------|-------|------------|-----|---------|------------------------|---------|------------|
| E1         | f | c.1384C>T (h)   | p.Arg462Trp     | [25]  |            | CNS | 0       | Interstitial nephritis | 8       | RTx        |
| E3         | m | c.1384C>T (h)   | p.Arg462Trp     | [25]  |            | CNS | 0       | DMS                    | 15      | PD         |
| E8         | m | c.1390G>A (h)   | p.Asp464Asn     | [25]  |            | CNS | 0       | DMS                    | 17      | RTx        |
| E13        | m | c.1390G>A (h)   | p.Asp464Asn     | [25]  |            | CNS | 0       | DMS                    | 4       | RTx        |
| E16        | m | c.1385G>A (h)   | p.Arg462Gln     | [26]  |            | CNS | 0       | FSGS                   | 4       | RTx        |
| E25        | m | c.1384C>T (h)   | p.Arg462Trp     | [25]  |            | 7   | 0       | DMS                    | 0       | RTx        |
| E35        | f | c.1384C>T (h)   | p.Arg462Trp     | [25]  |            | 50  | 0       | FSGS                   | 2       | RTx        |
| E47        | m | c.1384C>T (h)   | p.Arg462Trp     | [25]  |            | 60  | 0       | DMS                    | 0       | RTx        |
| E48        | f | c.1384C>T (h)   | p.Arg462Trp     | [25]  |            | 7   | 0       | FSGS                   | 0       | RTx        |
| H5         | m | c.1384C>T (h)   | p.Arg462Trp     | [25]  |            | 16  | 0       | FSGS                   |         | normal GFR |
| H18        | f | c.1384C>T (h)   | p.Arg462Trp     | [25]  |            | 10  | 0       | DMS                    | 0       | PD         |
| H29        | f | c.1394A>C (h)   | p.His465Pro     | [27]  |            | 17  | 0       | Not done               | 46      | RTx        |
| H40        | f | c.1288C>T (h)   | p.Arg430*       | [28]  |            | 147 | 0       | FSGS                   | 50      | HD         |
| H44        | f | c.1432+5G>A (h) | Splice mutation | [29]  |            | 60  | 0       | Not done <sup>c</sup>  |         | normal GFR |
| HH31       | m | c.1357T>C (h)   | p.Cys453Arg     | [30]  |            | CNS | 0       | DMS                    | 32      | RTx        |
| HH32       | f | c.1390G>A (h)   | p.Asp464Asn     | [25]  |            | 24  | 0       | DMS                    | No data | RTx        |
| HH33       | f | c.1339G>T (h)   | p.Gly447Cys     | [31]  |            | CNS | 0       | DMS                    | 3       | RTx        |
| HH34       | f | c.1432+5G>A (h) | Splice mutation | [29]  |            | 108 | N       | MCN                    |         | CKD        |
| HH35       | f | c.1432+5G>A (h) | Splice mutation | [29]  |            | 120 | 0       | MCN                    |         | normal GFR |
| K9         | f | c.1385G>C (h)   | p.Arg462Pro     | [29]  |            | 6   | 0       | DMS                    | 1       | RTx        |
| K10        | f | c.1391>G (h)    | p.Asp464Gly     | [25]  |            | 11  | 0       | DMS                    | 1       | RTx        |
| K11        | f | c.1301G>A (h)   | p.Arg434His     | [25]  |            | CNS | 0       | DMS                    | 0       | RTx        |
| K12        | m | c.1390G>C (h)   | p.Asp464His     | [32]  |            | CNS | 0       | DMS                    |         | normal GFR |
| K13        | f | c.1384C>T (h)   | p.Arg462Trp     | [25]  |            | CNS | 0       | DMS                    | 22      | PD         |
| K14        | f | c.1372C>G (h)   | p.Arg458Gly     | Novel | Dc, pd, d  | CNS | No data | DMS                    |         | normal GFR |
| K15        | f | c.1432+5G>A (h) | Splice mutation | [29]  |            | CNS | N       | FSGS                   |         | normal GFR |
| K16        | m | c.1339+2T>C (h) | Splice mutation | Novel | Dc, na, na | CNS | 0       | Not done               |         | normal GFR |
| K17        | f | c.1432+4C>T (h) | Splice mutation | [33]  |            | 48  | 0       | FSGS                   |         | normal GFR |
| MS5        | f | c.1366T>C (h)   | p.Cys456Arg     | [27]  |            | CNS | 0       | DMS                    | 21      | RTx        |

|                  |   |                                                  |                                               |                           |                          |     |                 |          |     |            |
|------------------|---|--------------------------------------------------|-----------------------------------------------|---------------------------|--------------------------|-----|-----------------|----------|-----|------------|
| MS16             | f | c.1432+4C>T (h)                                  | Splice mutation                               | [33]                      |                          | 48  | 0               | FSGS     | 171 | RTx        |
| MS21             | f | c.1394A>C (h)                                    | p.His465Pro                                   | [27]                      |                          | 15  | PR (1.5 months) | FSGS     | 97  | RTx        |
| MS27             | f | c.1432+4C>T (h)                                  | Splice mutation                               | [33]                      |                          | 61  | PR (8 months)   | FSGS     | 133 | RTx        |
| MS29             | f | c.1384C>T (h)                                    | p.Arg462Trp                                   | [25]                      |                          | 6   | 0               | DMS      | 1   | RTx        |
| <b>TRPC6</b>     |   |                                                  |                                               |                           |                          |     |                 |          |     |            |
| E40              | m | c.395T>C (h)                                     | p.Met132Thr                                   | [34]                      |                          | 104 | N               | FSGS     | 12  | RTx        |
| E45              | m | c.253_264dupGCATACATGTTT (h)                     | p.Ala85_Phe88dup                              | Novel                     | Dc, na, na               | 97  | N               | FSGS     | 64  | RTx        |
| E50              | m | c.2270G>A (h)                                    | p.Gly757Asp                                   | [2]                       |                          | 12  | 0               | FSGS     |     | CKD        |
| H30              | m | c.523C>T (h)                                     | p.Arg175Trp                                   | Novel                     | Dc, pd, d                | 14  | N               | FSGS     | 4   | RTx        |
| H45              | m | c.2656G>T (h)                                    | p.Glu886*                                     | Novel                     | Dc, na, na               | 96  | 0               | Not done | 26  | HD         |
| <b>INF2</b>      |   |                                                  |                                               |                           |                          |     |                 |          |     |            |
| E33              | f | c.787T>G (h)                                     | p.Ser263Ala                                   | Novel                     | Pm, b, t                 | 15  | N               | FSGS     | 22  | RTx        |
| E55              | m | c.658G>A (h)                                     | p.Glu220Lys                                   | [35]                      |                          | 156 | 0               | FSGS     |     | normal GFR |
| HD2              | m | c.1448C>T (h)                                    | p.Ser483Phe                                   | Novel                     | Pm, b, t                 | 48  | N               | FSGS     |     | normal GFR |
| <b>LAMB2</b>     |   |                                                  |                                               |                           |                          |     |                 |          |     |            |
| MS6 <sup>i</sup> | m | c.961T>C (h),<br>c.4140C>A (h) and c.4177C>T (h) | p.Cys321Arg,<br>p.Asn1380Lys and p.Lys1393Phe | [36],<br>[36] and<br>[36] |                          | CNS | 0               | Not done | 7   | RTx        |
| MS7 <sup>i</sup> | m | c.961T>C (h),<br>c.4140C>A (h) and c.4177C>T (h) | p.Cys321Arg,<br>p.Asn1380Lys and p.Lys1393Phe | [36],<br>[36] and<br>[36] |                          | CNS | 0               | Not done | 32  | RTx        |
| MS32             | m | c.2725dupA (h)                                   | p.Ile909Asnfs*23                              | Novel                     | Dc, na, na               | CNS | 0               | Not done | 6   | PD         |
| <b>PLCE1</b>     |   |                                                  |                                               |                           |                          |     |                 |          |     |            |
| H22              | f | c.4465T>C 8 (h), c.6377_6378delAA (h)            | p.Cys1489Arg, p.Lys2126Argfs*17               | Novel;<br>novel           | Dc, pd, d;<br>Dc, na, na | 31  | 0               | DMS      | 2   | RTx        |
| K25              | f | c.4483C>T (h)                                    | p.Arg1495*                                    | Novel                     | Dc, na, na               | CNS | No data         | DMS      | 5   | PD         |
| <b>ACTN4</b>     |   |                                                  |                                               |                           |                          |     |                 |          |     |            |
| HH25             | f | c.2020C>T (h)                                    | p.Arg674Cys                                   | Novel                     | Dc, pd, d                | 21  | CR (2.5 months) | MCN      |     | normal GFR |

**ARHGDI1A**

|     |   |              |           |      |     |   |     |   |    |
|-----|---|--------------|-----------|------|-----|---|-----|---|----|
| K34 | m | c.358C>T (H) | p.Arg120* | [37] | CNS | 0 | DMS | 1 | PD |
|-----|---|--------------|-----------|------|-----|---|-----|---|----|

**LMX1B**

|                  |   |              |             |      |     |   |      |     |            |
|------------------|---|--------------|-------------|------|-----|---|------|-----|------------|
| K26 <sup>k</sup> | f | c.737G>A (h) | p.Arg246Gln | [38] | 18  | N | FSGS |     | normal GFR |
| K27 <sup>k</sup> | m | c.737G>A (h) | p.Arg246Gln | [38] | 108 | N | FSGS | 276 | RTx        |

**Novel<sup>d</sup>**

|                   |   |                |                |  |     |   |          |         |            |
|-------------------|---|----------------|----------------|--|-----|---|----------|---------|------------|
| HH3               | f | Novel mutation | Novel mutation |  | 24  | N | FSGS     | 6       | RTx        |
| MS11 <sup>l</sup> | f | Novel mutation | Novel mutation |  | 101 | 0 | Not done |         | normal GFR |
| MS12 <sup>l</sup> | f | Novel mutation | Novel mutation |  | 31  | 0 | FSGS     | No data | RTx        |

**Abbreviations**

m=male; f=female; dc=disease causing; pd=probably damaging; d=damaging; na=not applicable; pm=polymorphism; b=benign; t=tolerated; 0=no CsA treatment; Y=patient responded to CsA treatment; N=patient did not respond to CsA treatment; CR=complete remission; PR=partial remission; MCN=minimal change nephropathy; DMS= diffuse mesangial sclerosis; FSGS =focal segmental glomerulosclerosis; GFR=glomerular filtration rate; CKD=chronic kidney disease; PD=peritoneal dialysis; HD=hemodialysis; RTx=renal transplantation

**References**

[1] Lenkkeri (1999) Am J Hum Genet 64, 51; [2] Büscher (2010) Clin J Am Soc Nephrol 5, 2075; [3] Beltcheva (2001) Hum Mutat 17, 368; [4] Schultheiss (2004) Pediatr Nephrol 19, 1340; [5] Gigante (2009) Nephrol Dial Transplant Plus 2 (suppl 2); [6] Schoeb (2010) Nephrol Dial Transplant 25, 2970; [7] Koziell (2002) Hum Mol Genet 11, 379; [8] Hinkes (2007) Pediatrics 119, e907; [9] Santín (2009) Kidney Int 76, 1268; [10] Cil (2015) Pediatr Nephrol epub, epub; [11] Kestila (1998) Mol Cell 1, 575; [12] Shi (2005) Zhonghua Er Ke Za Zhi 43, 805; [13] Klaasen (2015), Ped Nephrol epub ahead of print; [14] Gigante (2002) J Nephrol 15, 696; [15] Lahdenkari (2004) Kidney Int 65, 1856; [16] Boute (2000) Nat Genet 24, 349; [17] Tsukaguchi (2002) J Clin Invest 110, 1659; [18] Weber (2004) Kidney Int 66, 571; [19] Karle (2002) J Am Soc Nephrol 13, 388; [20] Hinkes (2007) Pediatrics 119, e907; [21] Tory (2014) Nat Genet 46, 299; [22] Ruf (2004) J Am Soc Nephrol 15, 722; [23] Machuca (2009) Kidney Int 75, 727; [24] Bouchireb (2014) Hum Mutat 35, 178; [25] Pelletier (1991) Cell 67, 437; [26] Jeanpierre (1998) Am J Hum Genet 62, 824; [27] Ruf (2004) Kidney Int 66, 564; [28] Clarkson (1993) J Med Genet 30, 767; [29] Bruening (1992) Nat Genet 1, 144; [30] Kikuchi (1998) J Med Genet 35, 45; [31] Schumacher (1998) Kidney Int 53, 1594; [32] Hakan (2012) Genet Couns 23, 255; [33] Barbaux (1997) Nat Genet 17, 467; [34] Heeringa (2009) PLoS One 4, e7771; [35] Brown (2010) Nat Genet 42, 72; [36] Hasselbacher (2006) Kidney Int 70, 1008; [37] Gee (2013) J Clin Invest 123, 3243; [38] Isojima (2014) Nephrol Dial Transplant 29, 81

**Footnotes**

<sup>a</sup>c.3108A nucleotide constitutes part of the GT 5' donor splice site recognition motif essential for the excision of IVS2; <sup>b</sup>the pathogenicity of p.Arg229Gln in this case is unclear as it is discussed to depend on the trans-associated mutation [21]; <sup>c</sup>nephroblastoma was identified in this patient; <sup>d</sup>these gene mutations have not been published so far. <sup>e-l</sup> familial cases indicated by footnotes.
